# Supplementary material
Source: HighWire-hosted journal article supplement (https://www.rcpjournals.org/highwire/filestream/12768/field_highwire_adjunct_files/10/S8._CT_Chest_CT-PA_findings_at_post-COVID_Review..pdf)
Supplement: S8._CT_Chest_CT-PA_findings_at_post-COVID_Review..pdf [file S8._CT_Chest_CT-PA_findings_at_post-COVID_Review..pdf]

| CT Chest / CT-PA findings                     | Number                                      |
|-----------------------------------------------|---------------------------------------------|
| Normal                                        | 37                                          |
| Incidental findings                           | 11                                          |
| Interstitial changes - fibrosis               | 14<br>(11 new, 3 thought to pre-date COVID) |
| Interstitial changes – ground glass opacities | 3                                           |
| Resolving pulmonary emboli changes            | 2                                           |

### **S8. CT Chest / CT-PA findings at Post COVID Review.**

CT imaging findings in patients selected for further Post COVID imaging. Incidental findings included emphysema, bronchiectasis, sarcoidosis, pulmonary nodules. Resolving pulmonary emboli (PE) changes include resolving emboli and infarcts on follow-up imaging in patients known from previous imaging to have had a PE. No new PEs were identified in Post COVID imaging that had not been diagnosed on imaging undertaken before 12 weeks post-discharge. CT = Computed Tomography; PA = Pulmonary Angiography.
